# Supplementary material for: Transcutaneous afferent patterned stimulation reduces essential tremor symptoms through modulation of neural activity in the ventral intermediate nucleus of the thalamus
Source: bioRxiv or medRxiv preprint supplement (doi:10.1101/2024.12.02.24317799), 2024-12-05
Supplement: Supplementary file [file media-1.pdf]

## 1 **Supplementary Appendix**

- 2 1. Supplementary Methods
- 3 2. Supplementary Equations
- 4 3. Supplementary Figures

### 5 6 **1. Supplementary Methods**

#### 7 8 *1.1 Motion Artifacts Removal*

9  
10 Raw MER underwent zero-phase digital filtering (filtfilt function) using the transfer function  
11 coefficients of a 4th-order Butterworth filter, low-pass cutoff frequency at 7500 Hz.

12  
13 Next, we applied a portion of Banks et. al's algorithm to create the first mask for blanking  
14 transient artifacts across all 3 recording channels at each depth.<sup>1</sup> "Transient artifacts were  
15 detected by identifying voltage deflections exceeding 10 standard deviations on a given  
16 channel. A time window was identified extending before and after the detected artifact until the  
17 voltage returned to the zero-mean baseline plus an additional 100 ms buffer before and after.  
18 High-frequency artifacts were also removed by masking segments of data with high gamma  
19 power exceeding 5 standard deviations of the mean across all segments." We reasoned that  
20 motion would induce artifacts in all channels, thus, we extended the algorithm to mark regions  
21 for blanking only when artifacts appeared across all 3 channels simultaneously.

22  
23 While the algorithm could identify and blank portions of what we suspected as motion artifacts,  
24 on visual inspection, it left behind many obvious artifact segments between blanking regions.  
25 We created a second artifact removal mask using an iterative scanning window method to  
26 optimize for sensitivity and specificity. On a given channel, we calculated the moving root mean  
27 square (RMS) windowed at 0.5 ms. We tagged a point for removal if it exceeded 4 standard  
28 deviations of the mean moving RMS in the whole channel; this is the working masking. Next, we  
29 iteratively scanned in overlapping windows of 0.1, 25, and 250 ms and tagged all time point in  
30 the window for removal if it contained at least 2, 30, and 100 points, respectively, marked for  
31 removal. This iterative process increased sensitivity of artifact removal under the hypothesis that  
32 segments between RMS spikes that are close in time are likely motion artifact. We improved the  
33 specificity for motion artifact by creating a unified blanking mask that only blank segments  
34 where all 3 channels were tagged for removal. Additionally, we superimposed the 3 channels in  
35 the working mask to calculate the blanking density, a quotient dividing the number of points  
36 where RMS exceeded 4 standard deviations of mean RMS to their respective blanking window  
37 duration. We created the final second mask by filtering for blanking segments of at least 1 ms,  
38 with blanking density of at least 0.5 standard deviations above mean blanking density of all  
39 segments in the unified mask.

40  
41 We merged the masks from Banks et al's algorithm and our iterative scanning window algorithm  
42 to create the third mask. However, we noticed that there were still gaps between blanking long  
43 blanking segments that were likely artifacts. We bridged them by identifying gaps that were 250-  
44 750 ms long and tagging them for blanking if the segment of the enveloping artifacts and gap  
45 has artifact that exceed 66% of the segment duration (Supplementary Fig. S8).

46  
47 Prior to PSD or spike count calculation, we binned MER in consecutive 1 second segments.  
48 Segments with greater than 0.1 second of motion artifacts were further blanked and excluded  
49 from the analysis.

#### 50 51 *1.2 Spikes Acquisition*

52  
53 To extract spiking activities, raw MER underwent a similar filtering method as during motion  
54 artifact removal, though here we used a 4<sup>th</sup> order butterworth bandpass filter with cut-off  
55 frequencies between 500 and 7500 Hz. We removed time segment previously identified as  
56 motion artifact and identified spikes using a threshold-cross method. On a given channel, we  
57 normalized the signal by taking a difference of the signal and the mean across the recording  
58 duration. Spikes onsets were marked when the normalized signal exceeded 5 standard  
59 deviations of its mean. We removed consecutive spikes having inter-spike interval less than 1  
60 ms as these are likely too frequent to be physiologic spikes.

61  
62 Next, we filtered for areas with likely multiunit activity, selecting the recordings where spike rate  
63 was at least 1 Hz during the treatment OFF condition. Then, in each selected recording, we  
64 calculated the spike count in nonoverlapping 1 second segments. To increase the accuracy of  
65 our spike rate estimate, we applied a bootstrap resampling method that resampled the  
66 segments with replacement 10000 times to estimate the distribution of spike rates for each time  
67 series. The most likely spike rate was selected as the median from the distribution.

68

### 69 *1.3 Distance from Implant Location*

70

71 We defined the distance from implant location (DIL) as the Euclidean distance between each  
72 recording site and the final position of the bottom edge of the most inferior contact on the  
73 implanted electrode. This metric provides greater precision than depth measurements alone,  
74 which is crucial since the microelectrodes in our recording array are spaced 2 mm apart and  
75 likely detected varying amplitudes of Local Field Potentials (LFPs) and spike rates. While the  
76 initial DBS target in the ventral intermediate nucleus (VIM) is selected preoperatively using  
77 patient imaging data and standard stereotactic coordinates, the final implant location may differ  
78 based on intraoperative electrophysiological mapping and the observed balance between  
79 tremor reduction and side effects during stimulation testing. Therefore, characterizing neural  
80 activity relative to DIL, rather than the planned target, was more accurate site of actual  
81 treatment by DBS implant.

82

83

84

### 85 **References for the Supplementary Appendix**

- 86 1. Banks MI, Krause BM, Berger DG, et al. Functional geometry of auditory cortical resting state  
87 networks derived from intracranial electrophysiology. *PLOS Biol.* 2023;21(8):e3002239.  
88 doi:10.1371/journal.pbio.3002239

89

## 90 2. Supplementary Equations

91

$$92 \text{ Improvement}_{total} (I) = \frac{1}{5} \sum_{k=1}^5 (\text{Task Score}_{k,pre-treatment} - \text{Task Score}_{k,post-treatment}) \text{ (Eq. S1)}$$

93 **Equation S1.** Total tremor improvement was calculated by averaging changes across 5  
94 TETRAS tasks (forward postural hold, lateral "wing beating" postural hold, kinetic finger-to-nose,  
95 spiral drawing, and dot approximation) in both treated and untreated limbs. Changes were  
96 calculated as pre-treatment minus post-treatment scores, where positive values indicate tremor  
97 improvement and negative values indicate tremor worsening.

98

99

$$100 \text{ fractional Tremor Reduction (fTR)} \sim I_{kinetic} + I_{spiral\ drawing} + I_{dot\ approximation} \text{ (Eq. S2A)}$$

$$101 \text{ fractional Tremor Reduction (fTR)} \sim I_{forward} + I_{lateral} \text{ (Eq. S2B)}$$

102

$$103 \text{ fractional Tremor Reduction (fTR)} \sim S_{kinetic} + S_{spiral\ drawing} + S_{dot\ approximation} \text{ (Eq. S2C)}$$

$$104 \text{ fractional Tremor Reduction (fTR)} \sim S_{forward} + S_{lateral} \text{ (Eq. S2D)}$$

105 **Equation S2.** Multiple linear regression models examining relationships between fTR and:  
106 **(S2A)** improvements in kinetic tremors, **(S2B)** improvements in postural tremors, **(S2C)** baseline  
107 kinetic tremor TETRAS scores, and **(S2D)** baseline postural tremor TETRAS scores.

108

109

$$110 \text{ Modulation Index (MI)}_{LFP-Band} \sim \text{Distance from Implant Location (DIL)} \text{ (S3A)}$$

$$111 \text{ Modulation Index (MI)}_{LFP-Band} \sim \text{functional Tremor Reduction (fTR)} \text{ (S3B)}$$

112 **Equation S3.** Simple linear regression models studying how TAPS-induced modulation of local  
113 field potentials across canonical frequency bands relates to **(S3A)** DIL and **(S3B)** fTR.

114

115

$$116 \text{ Modulation Index (MI)}_{spikes} \sim \text{Distance from Implant Location (DIL)} \text{ (S4A)}$$

$$117 \text{ Modulation Index (MI)}_{spikes} \sim \text{functional Tremor Reduction (fTR)} \text{ (S4B)}$$

118 **Equation S4.** Simple linear regression models studying how TAPS-induced modulation of  
119 spiking activity relates to **(S4A)** DIL and **(S4B)** fTR.

120 **3. Supplementary Figures**  
 121

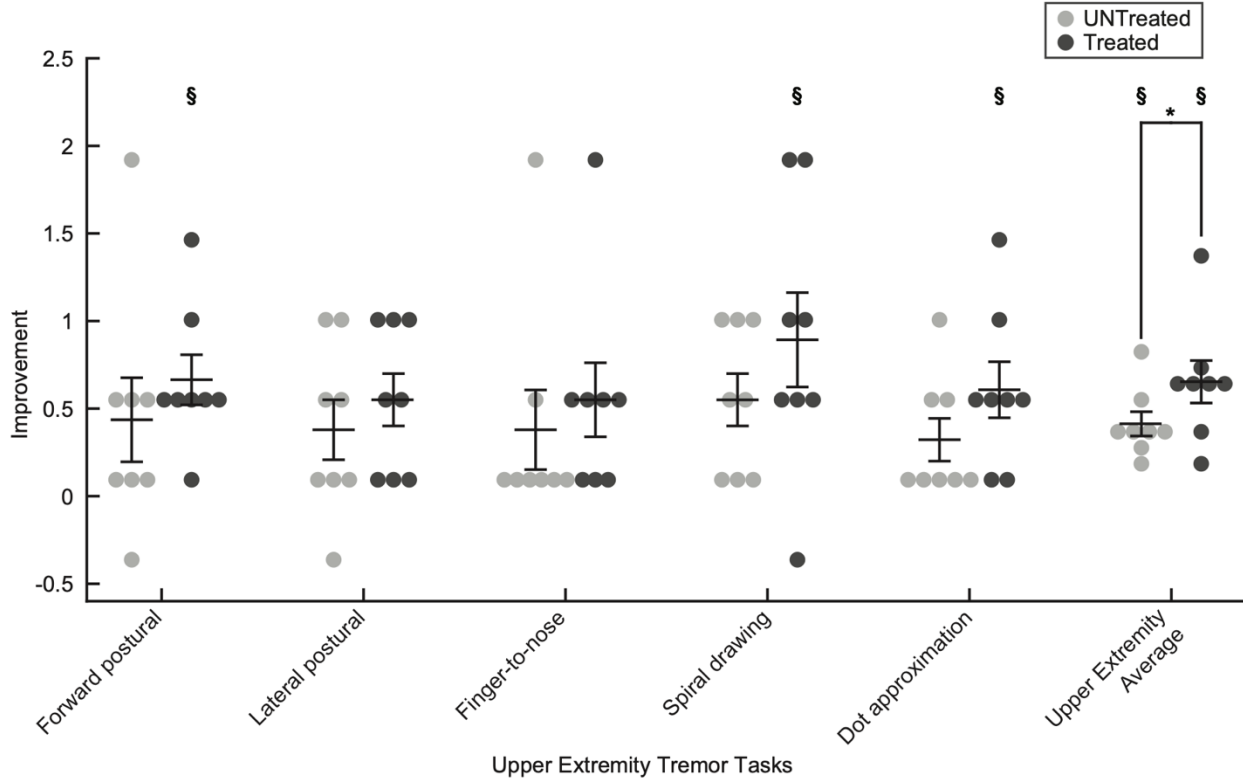

122  
 123  
 124 **Figure S1. TAPS improved tremor in both limbs, with only the dominant, treated limb**  
 125 **showing significant improvements in specific tasks.** In the treated limb, forward postural  
 126 hold tremor improved by  $0.625 \pm 0.157$  (§p=0.016), spiral drawing by  $0.875 \pm 0.295$  (§p=0.039),  
 127 and dot approximation by  $0.563 \pm 0.175$  (§p=0.031). Average total tremor improvement was  
 128  $0.613 \pm 0.133$  (§p=0.008) in the treated limb and  $0.35 \pm 0.076$  (§p=0.008) in the untreated limb,  
 129 with a significant difference between limbs (\*p=0.047). All values show Mean  $\pm$  SEM. §One-  
 130 sample, two-sided, Wilcoxon signed-rank test with  $p \leq 0.05$ . \*Two-sample, two-sided, Wilcoxon  
 131 signed-rank test with  $p \leq 0.05$ .

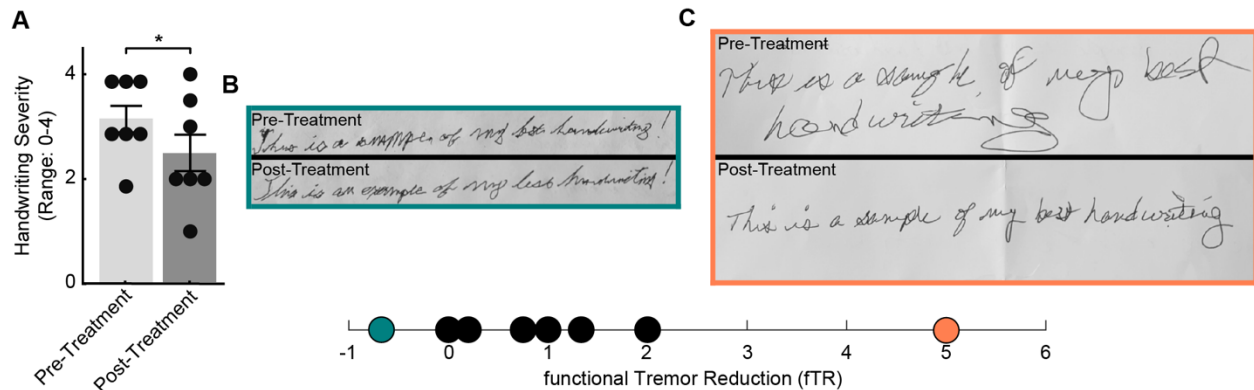

132  
133  
134 **Figure S2. Handwriting tremor in the dominant limb significantly improves following**  
135 **TAPS treatment (n=7).** **A** Handwriting from the dominant, treated limb showed pre-treatment  
136 scores (Mean  $\pm$  SEM =  $3.29 \pm 0.29$ ) decreased relative to post-treatment scores ( $2.50 \pm 0.39$ )  
137 (\*two-sided signed-rank test with  $p=0.002$ ). Data was not collected one patient who writes with  
138 their non-dominant, untreated limb. **B–C** Representative handwriting samples before and after  
139 TAPS treatment from patients with **(B)** low (cyan) and **(C)** high (orange) fTR.

140  
141  
142

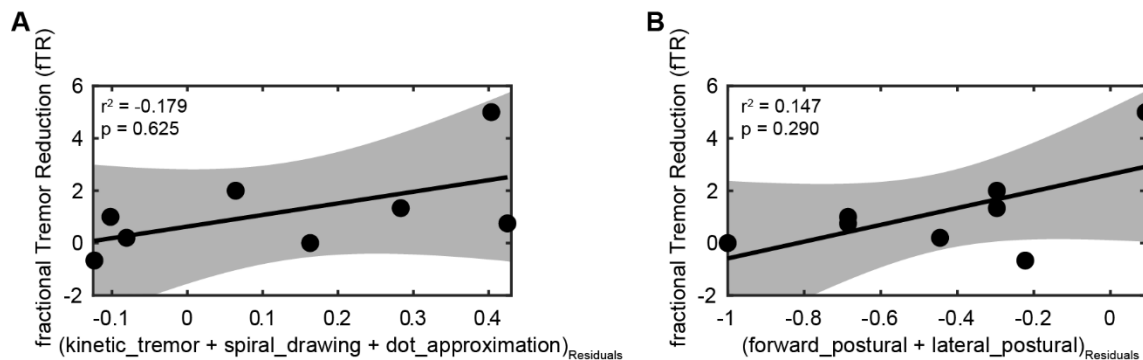

143  
144 **Figure S3. Initial kinetic and postural tremor scores show no significant correlation with**  
145 **fTR.** **A–B** Multiple linear regression analyses showing the relationship between fTR and  
146 baseline TETRAS scores for **(A)** kinetic tremor tasks and **(B)** postural tremor tasks.

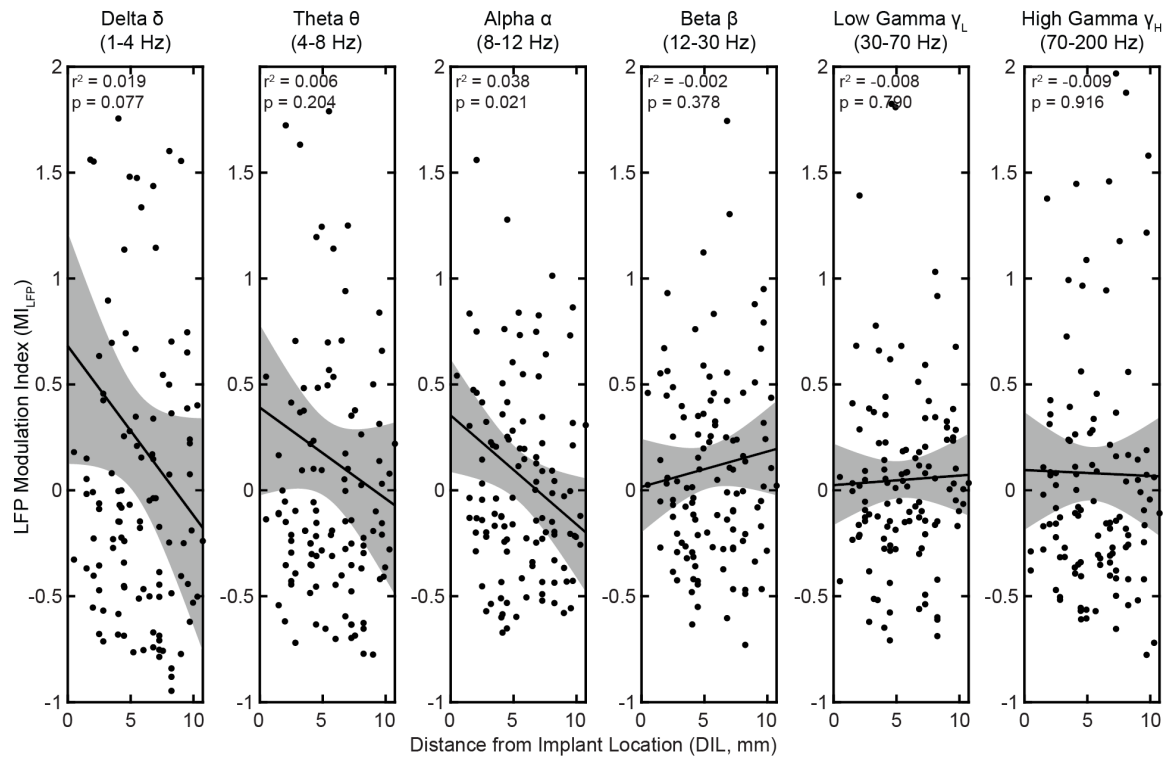

147  
 148  
 149  
 150  
 151  
 152  
 153

**Figure S4. LFP modulation ( $MI_{LFP}$ ) shows no correlation with distance from implant location (DIL) when data from 0-10 mm is considered together.** Linear regression analyses comparing  $MI_{LFP}$  to DIL across 6 frequency bands. Unlike Supplementary Fig. S5, MER data was analyzed together without segregation based on location that is within or outside the VIM. The  $\alpha$ -band modulation showed a trend toward significance but did not meet the Bonferroni-corrected threshold ( $\alpha'=0.008$ ).

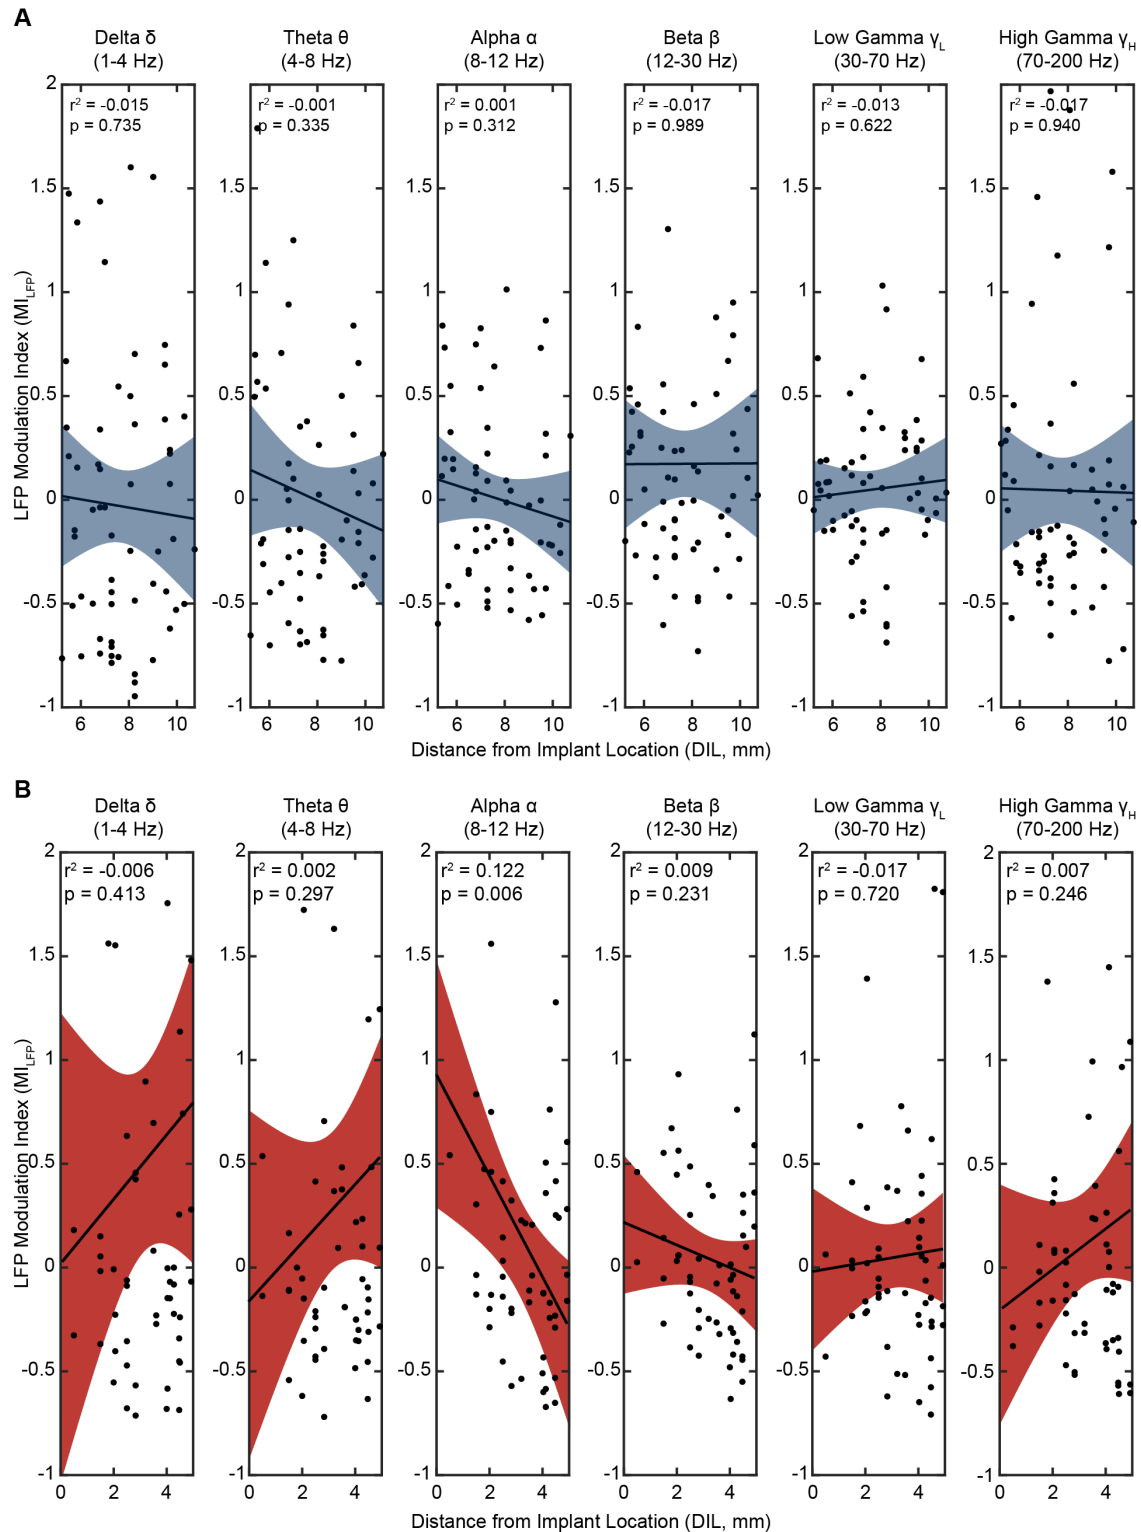

154  
155  
156  
157  
158

**Figure S5. Within the VIM,  $MI_{LFP}$  displays a significant, negative correlation to DIL for the alpha band. A–B** Linear regression analyses comparing  $MI_{LFP}$  to DIL across 6 frequency bands for recordings **(A)** outside VIM (5.01–10 mm, blue) and **(B)** within VIM (0–5 mm, red). Significance threshold was Bonferroni-corrected to  $\alpha'=0.008$ .

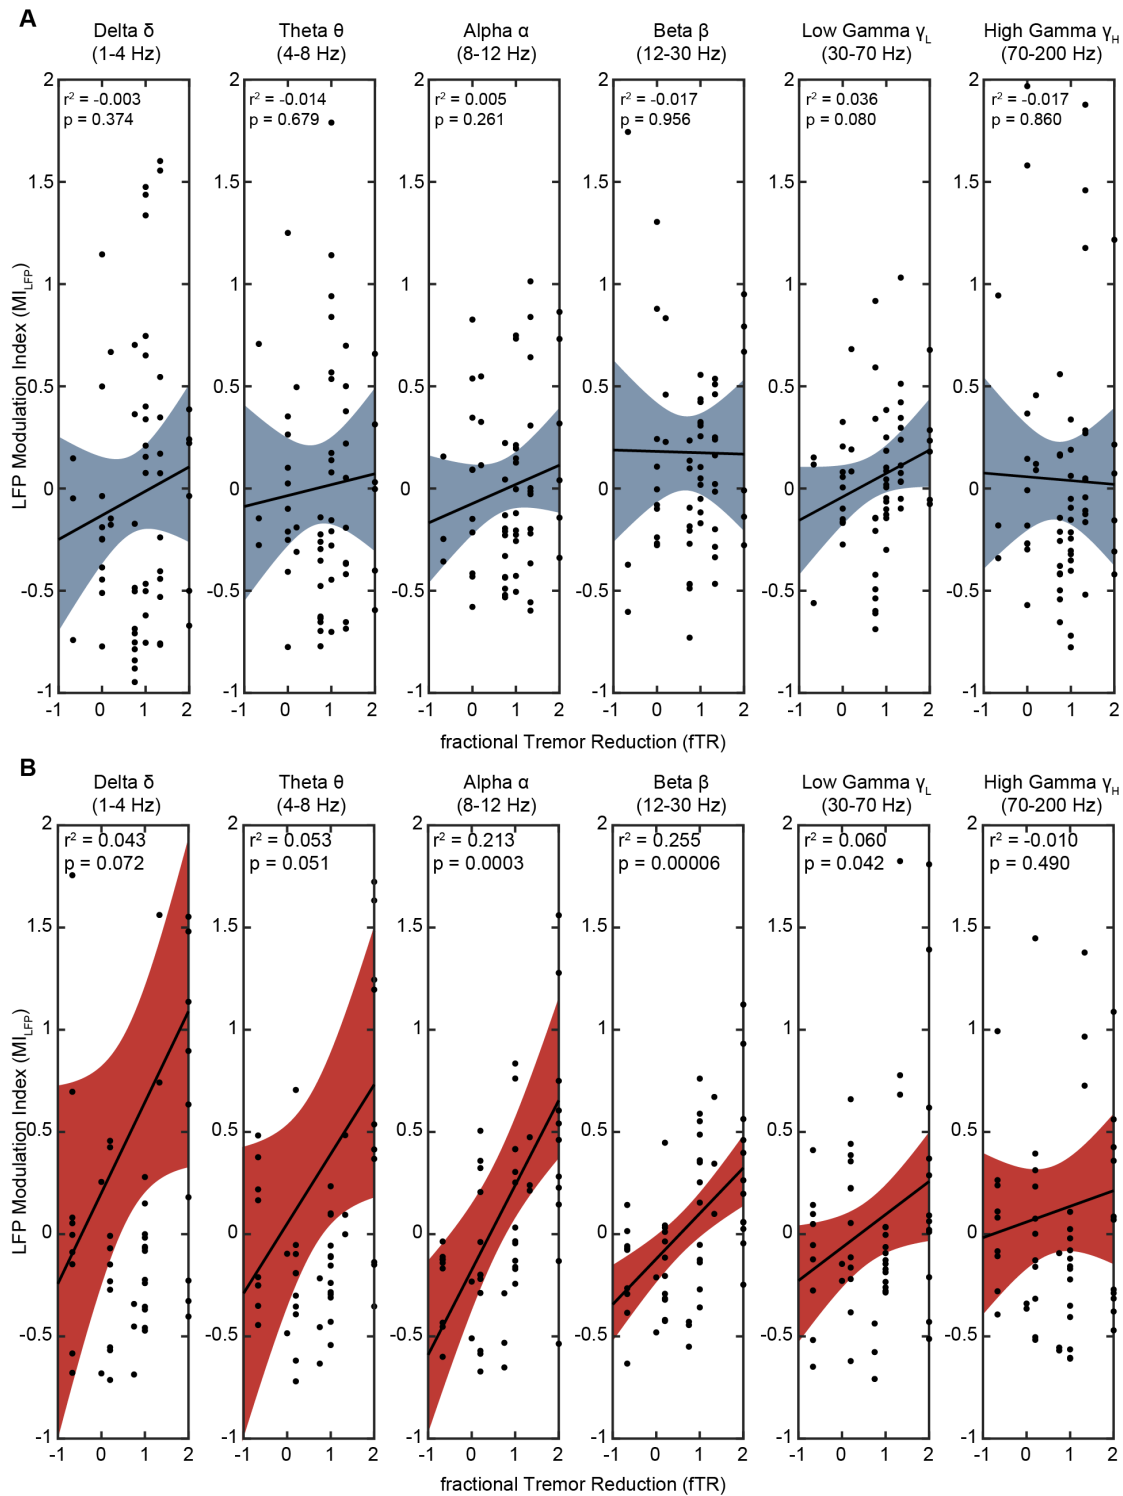

159  
 160  
 161  
 162  
 163

**Figure S6. Within the VIM,  $ML_{LFP}$  displays a significant, positive correlation to fTR for the alpha and beta bands. A–B** Linear regression analyses comparing  $ML_{LFP}$  to fTR across 6 frequency bands for recordings **(A)** outside VIM (5.01-10 mm, blue) and **(B)** within VIM (0-5 mm, red). Significance threshold was Bonferroni-corrected to  $\alpha'=0.008$ .



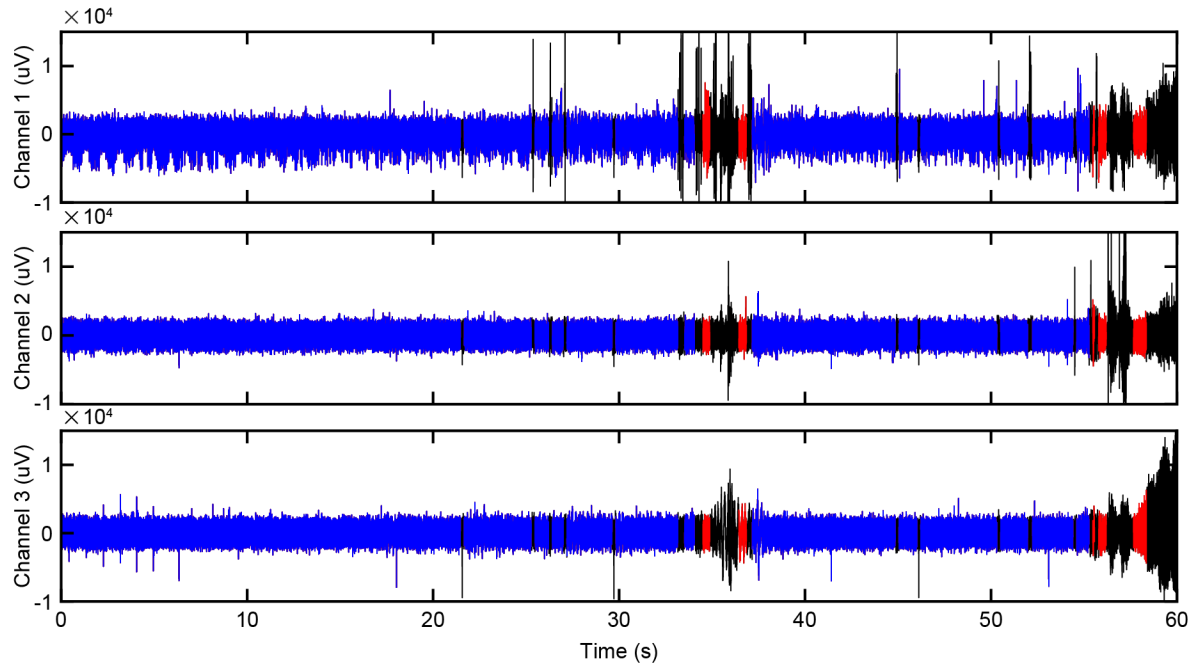

164  
 165  
 166  
 167  
 168  
 169  
 170  
 171

**Figure S7. Motion artifacts from thalamic MER were removed prior to further analysis.** Sample microelectrode recordings (MER) taken 7.50-7.76 mm from the final implant location, showing recordings from the anterior (Channel 1), middle (Channel 2), and posterior (Channel 3) electrodes. Low-pass filtered waveforms (blue) are shown with artifact segments (black) identified using combined criteria from Bank et al. and our iterative scanning window masks. Signal segments between artifacts were further marked for blanking (red) if artifacts make up at least 66% of the segment created by including adjacent artifacts.

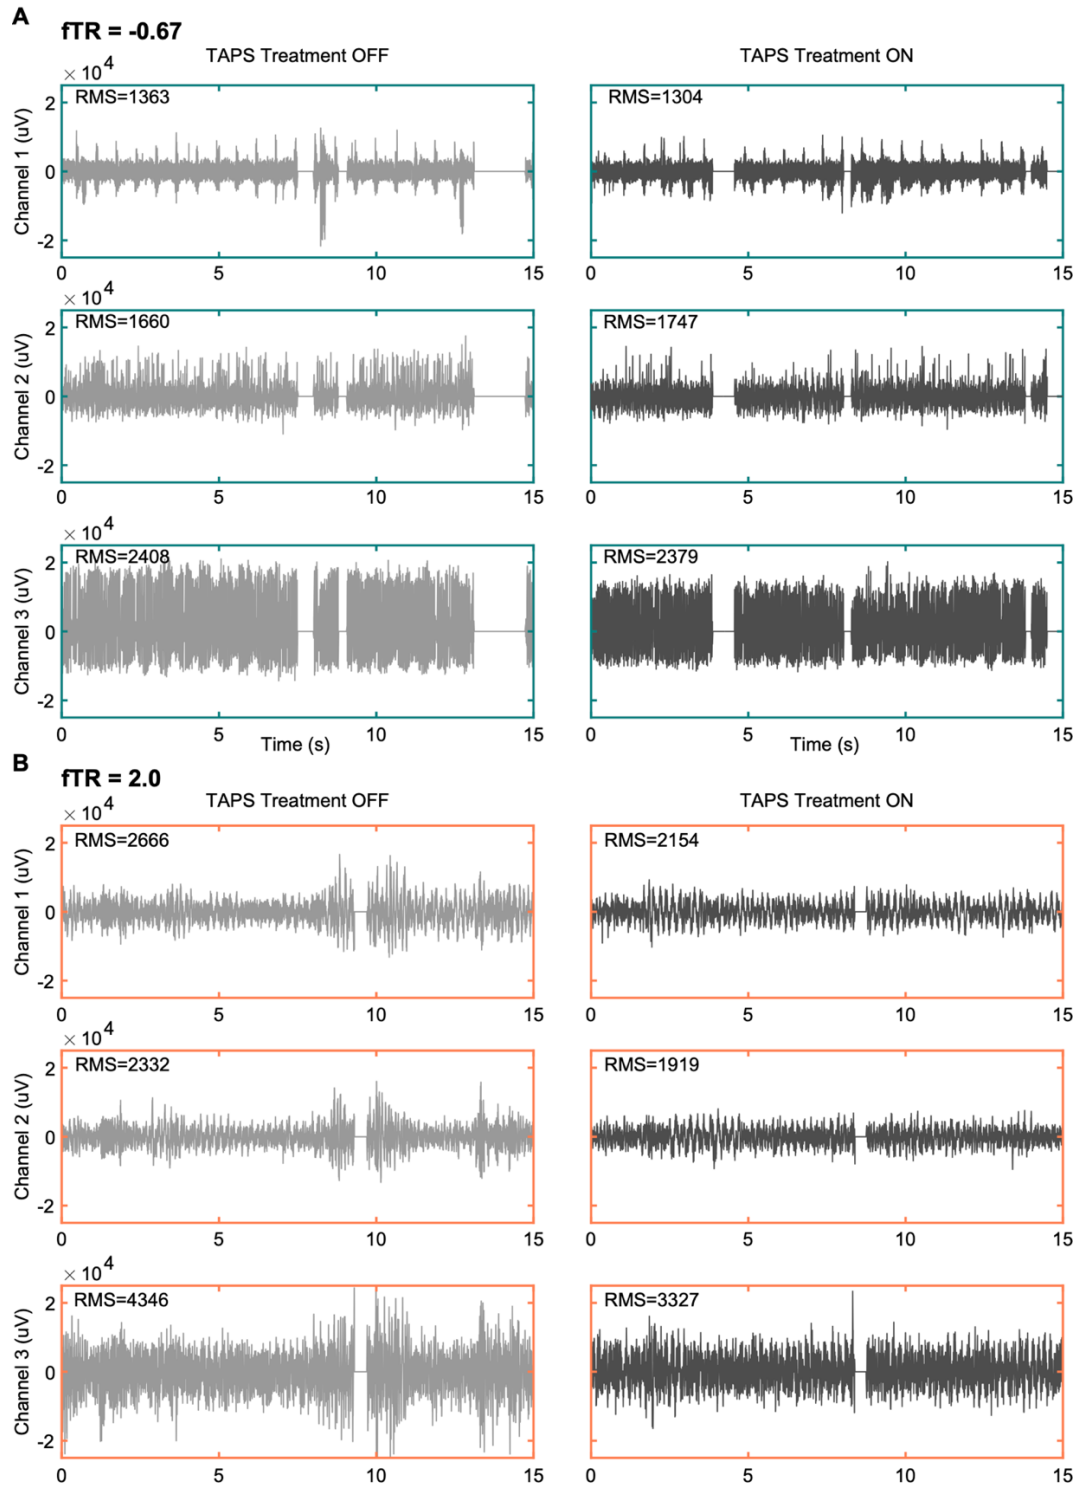

172  
 173 **Figure S8. TAPS did not produce stimulation artifacts in MER data, regardless of low or**  
 174 **high fTR. A–B** Representative multi-channel recordings taken 3 mm from target in two patients  
 175 with different treatment responses: **(A)** low fTR (-0.067) and **(B)** high fTR (2.0). Fifteen-second  
 176 segments from 60-second recordings are shown to enable detailed visual inspection.  
 177 Stimulation artifacts, not seen, would appear as an additive pattern of regular spikes during the  
 178 TAPS ON state, increasing the RMS value. Segments of no signal (0 uV) concurring across 3  
 179 channels are segments of motion artifacts, removed by Supplementary Methods 1.1.
